# Supplementary material for: Abnormal Alpha-1 Antitrypsin Levels and Other Risk Factors Associated with Lung Function Impairment at 6 and 12 Months after Hospitalization Due to COVID-19: A Cohort Study
Source: MDPI journal article supplement (doi:10.3390/healthcare10122341), 2022-11-22
Supplement: s1 [file s1]

## Supplementary Tables

**Table S1.** Summary of the characteristics of the patients included in the study

| <b>First follow-up consultations</b>                 |
|------------------------------------------------------|
| Goes for consultation, N=182 patients                |
| <i>Characteristics</i>                               |
| Age (years), median (IQR)                            |
| Sex, N (%):                                          |
| Male                                                 |
| Female                                               |
| BMI (kg/m2)                                          |
| Smoking history, N° (%):                             |
| Cumulative tobacco burden index (ICAT), N° (%):      |
| Current                                              |
| Former                                               |
| Nonsmoker                                            |
| <i>Personal history.</i>                             |
| Baseline comorbidities <2; ≥2, N° (%)                |
| High blood pressure (HBP), N° (%)                    |
| Diabetes Mellitus 2 (DM2), N° (%)                    |
| Dyslipemia, N° (%)                                   |
| Ischemic cardiopathy: N° (%)                         |
| Cardiac arrhythmias N° (%)                           |
| Cerebrovascular disease, N° (%)                      |
| Baseline respiratory comorbidities, N° (%)           |
| Chronic obstructive pulmonary disease (COPD), N° (%) |
| Baseline liver disease, N° (%)                       |
| Chronic kidney disease, N° (%)                       |

|                                                                                                                                                                                                                                                                                                                                                                                                                                                                                                                                                                            |
|----------------------------------------------------------------------------------------------------------------------------------------------------------------------------------------------------------------------------------------------------------------------------------------------------------------------------------------------------------------------------------------------------------------------------------------------------------------------------------------------------------------------------------------------------------------------------|
| Active tumor, N° (%)                                                                                                                                                                                                                                                                                                                                                                                                                                                                                                                                                       |
| History of previous tumor <5 años, N° (%)                                                                                                                                                                                                                                                                                                                                                                                                                                                                                                                                  |
| Charlson Comorbidity index <3; ≥3, N° (%)                                                                                                                                                                                                                                                                                                                                                                                                                                                                                                                                  |
| <i>Admission symptoms</i>                                                                                                                                                                                                                                                                                                                                                                                                                                                                                                                                                  |
| Fever (>37.5°C), N° (%)                                                                                                                                                                                                                                                                                                                                                                                                                                                                                                                                                    |
| Dyspnea, N° (%)                                                                                                                                                                                                                                                                                                                                                                                                                                                                                                                                                            |
| Cough, N° (%)                                                                                                                                                                                                                                                                                                                                                                                                                                                                                                                                                              |
| Fatigue, N° (%)                                                                                                                                                                                                                                                                                                                                                                                                                                                                                                                                                            |
| Musculoskeletal discomfort, N° (%)                                                                                                                                                                                                                                                                                                                                                                                                                                                                                                                                         |
| Anosmia/ageusia, N° (%)                                                                                                                                                                                                                                                                                                                                                                                                                                                                                                                                                    |
| Digestive symptoms, N° (%)                                                                                                                                                                                                                                                                                                                                                                                                                                                                                                                                                 |
| Cardiac symptoms, N° (%)                                                                                                                                                                                                                                                                                                                                                                                                                                                                                                                                                   |
| Neurological symptoms, N° (%)                                                                                                                                                                                                                                                                                                                                                                                                                                                                                                                                              |
| Dermatological symptoms, N° (%)                                                                                                                                                                                                                                                                                                                                                                                                                                                                                                                                            |
| ARDS (PaO <sub>2</sub> /FIO <sub>2</sub> < 300 mmHg):                                                                                                                                                                                                                                                                                                                                                                                                                                                                                                                      |
| <i>Hospitalization.</i>                                                                                                                                                                                                                                                                                                                                                                                                                                                                                                                                                    |
| Average length of stay (days)                                                                                                                                                                                                                                                                                                                                                                                                                                                                                                                                              |
| Pneumonia on admission No. (%)                                                                                                                                                                                                                                                                                                                                                                                                                                                                                                                                             |
| <ul style="list-style-type: none"> <li>• Characteristics of pneumonia on chest X-ray, No. (%)</li> <li>-Density: <ul style="list-style-type: none"> <li>Alveolar</li> <li>Ground glass opacity (GGO)</li> <li>Mixed</li> </ul> </li> <li>-Distribution: <ul style="list-style-type: none"> <li>Central</li> <li>Peripheral</li> <li>Mixed</li> </ul> </li> <li>-Location: <ul style="list-style-type: none"> <li>Unilateral</li> <li>Bilateral</li> </ul> </li> <li>-Extension: <ul style="list-style-type: none"> <li>Unilobar</li> <li>Multilobar</li> </ul> </li> </ul> |

|                                                                                                                                                                                                                     |
|---------------------------------------------------------------------------------------------------------------------------------------------------------------------------------------------------------------------|
| ICU admission, No. (%)                                                                                                                                                                                              |
| Orotracheal intubation (OTI, No. (%))                                                                                                                                                                               |
| Treatment received, No. (%) <ul style="list-style-type: none"> <li>- Corticosteroids</li> <li>- Antiviral drugs</li> <li>- Tocilizumab</li> <li>- Anakinra</li> <li>- Antimalarials (hydroxychloroquine)</li> </ul> |
| <b>Second follow-up consultations</b>                                                                                                                                                                               |
| Goes for consultation, N= 168                                                                                                                                                                                       |
| <i>Pulmonary function</i>                                                                                                                                                                                           |
| FVC <80%, % of predicted                                                                                                                                                                                            |
| FEV1 <80%, % of predicted                                                                                                                                                                                           |
| FEV1/FVC <70%                                                                                                                                                                                                       |
| TLC <80%, % of predicted                                                                                                                                                                                            |
| VR <65%, % of predicted                                                                                                                                                                                             |
| DLCO <80%, % of predicted                                                                                                                                                                                           |
| KCO<80%, % of predicted                                                                                                                                                                                             |
| 6MWT                                                                                                                                                                                                                |
| Distance-meters, median (IQR)                                                                                                                                                                                       |
| Oxygen saturation, median (IQR)                                                                                                                                                                                     |
| Average                                                                                                                                                                                                             |
| Initial                                                                                                                                                                                                             |
| Final                                                                                                                                                                                                               |
| <b>Third follow-up consultations</b>                                                                                                                                                                                |
| Goes for consultation, N=157                                                                                                                                                                                        |
| Pulmonary function performed only on patients with alterations at 6 months.                                                                                                                                         |
| Laboratory findings at 12 months (mean ± SD)                                                                                                                                                                        |
| Alpha 1 antitrypsin (mg/dl)                                                                                                                                                                                         |
| Alpha antitrypsin normal range, N° (%)                                                                                                                                                                              |

ARDS=Acute respiratory distress syndrome; ICU= Intensive care unit; BMI= body mass index; IOT=Intubation orotraqueal; FVC=forced vital capacity; FEV1=forced expiratory volume in the first second; TLC=total lung capacity; RV=residual volume; DLCO=carbon monoxide transfer by single breath; KCO= diffusion constant for carbon monoxide; 6MWT=six-minute walking test; SD: standard deviation

**Table S2.** Laboratory parameters of patients on admission, during hospitalization and at the 12-month follow-up

| Laboratory parameters                       | Lung function at 12 months                |                                            | p-value |
|---------------------------------------------|-------------------------------------------|--------------------------------------------|---------|
|                                             | Normal (n=108)<br>(mean ± SD)<br>or n (%) | Impaired (n=49)<br>(mean ± SD)<br>or n (%) |         |
| On admission                                |                                           |                                            |         |
| Hemoglobin (g/dl)                           | 14.5±1.5                                  | 13.7±2.1                                   | 0.017   |
| Leukocytes (count<br>x10 <sup>3</sup> /μl)  | 6.3±2.6                                   | 7.7±3.2                                    | 0.011   |
| Neutrophils (count<br>x10 <sup>3</sup> /μl) | 4.8±2.4                                   | 5.9±2.7                                    | 0.024   |
| Lymphocytes (count<br>x10 <sup>3</sup> /μl) | 1.3±1.1                                   | 1.1±0.5                                    | 0.044   |
| Ferritin (ng/ml)                            | 745.3±857.9                               | 624.5±688.3                                | 0.523   |
| Platelets (count/μl)                        | 214,819±85,918                            | 263,851±135,238                            | 0.012   |
| C-Reactive Protein (mg/l)                   | 79.2±68.8                                 | 88.7±73.1                                  | 0.358   |
| Lactate dehydrogenase<br>(U/l)              | 344.1±122.5                               | 372.4±113.3                                | 0.161   |
| AST/Aspartate<br>transaminase (U/l)         | 44.0±31.8                                 | 38.2±26.3                                  | 0.407   |
| ALT/Alanine<br>transaminase (U/l)           | 40.0±30.1                                 | 32.9±22.2                                  | 0.736   |
| Albumin (g/dl)                              | 4.0±0.8                                   | 5.1±6.9                                    | 0.360   |
| D-dimer (mg/l)                              | 0.76±1.07                                 | 2.3±5.4                                    | 0.084   |
| Fibrinogen (mg/dl)                          | 641.0±193.7                               | 666.6±213.2                                | 0.255   |
| Blood glucose (mg/dl)                       | 115.2±38.2                                | 123.8±55.0                                 | 0.307   |
| During hospitalization                      |                                           |                                            |         |
| Hemoglobin (g/dl)                           | 15.4±15.9                                 | 13.0±2.0                                   | 0.008   |
| Leukocytes (count<br>x10 <sup>3</sup> /μl)  | 7.6±3.7                                   | 8.0±3.1                                    | 0.466   |

|                                          |                 |                 |       |
|------------------------------------------|-----------------|-----------------|-------|
| Neutrophils (count x10 <sup>3</sup> /μl) | 6.1±5.1         | 6.0±3.3         | 0.969 |
| Lymphocytes (count x10 <sup>3</sup> /μl) | 1.4±1.0         | 1.3±0.8         | 0.206 |
| Ferritin (ng/ml)                         | 1,133±1,560     | 1,577±2,043     | 0.197 |
| Platelets (count/μl)                     | 323,641±188,349 | 329,674±163,188 | 0.993 |
| C-Reactive Protein (mg/l)                | 54.2±102.5      | 70.3±77.2       | 0.400 |
| Lactate dehydrogenase (U/l)              | 328.8±104.3     | 386.6±145.2     | 0.011 |
| AST/Aspartate transaminase (U/l)         | 40.4±34.0       | 58.5±64.7       | 0.213 |
| ALT/Alanine transaminase (U/l)           | 64.8±118.3      | 99.3±163.4      | 0.078 |
| Albumin (g/dl)                           | 3.8±0.5         | 3.6±0.5         | 0.048 |
| D-dimer (mg/l)                           | 2.1±8.3         | 2.8±5.4         | 0.662 |
| Fibrinogen (mg/dl)                       | 589.8±223.5     | 590.7±253.4     | 0.938 |
| Blood glucose (mg/dl)                    | 112.1±48.8      | 135.6±87.4      | 0.061 |
| IL-6 (pg/ml)                             | 20.5±4.4        | 57.1±13.5       | 0.090 |
| <b>At 12-month follow-up</b>             |                 |                 |       |
| Hemoglobin (g/dl)                        | 15.0±1.5        | 14.2±2.0        | 0.012 |
| Leukocytes (count x10 <sup>3</sup> /μl)  | 6.6±1.8         | 7.0±1.5         | 0.633 |
| Neutrophils (count x10 <sup>3</sup> /μl) | 4.0±2.6         | 4.3±2.9         | 0.995 |
| Lymphocytes (count x10 <sup>3</sup> /μl) | 2.2±0.9         | 2.2±0.8         | 0.536 |
| Ferritin (ng/ml)                         | 173.3±364.5     | 91.8±76.8       | 0.023 |
| Platelets (count/μl)                     | 221,820±61,508  | 256,583±113,230 | 0.028 |
| C-Reactive Protein (mg/l)                | 3.5±4.6         | 4.6±5.6         | 0.358 |
| Lactate dehydrogenase (U/l)              | 179.73±34.6     | 200.3±60.0      | 0.017 |
| AST/Aspartate transaminase (U/l)         | 25.8±15.6       | 22.4±7.5        | 0.261 |

|                                  |             |             |       |
|----------------------------------|-------------|-------------|-------|
| ALT/Alanine transaminase (U/l)   | 28.6±28.0   | 22.3±13.0   | 0.134 |
| Albumin (g/dl)                   | 4.7±4.3     | 4.2±0.3     | 0.442 |
| D-dimer (mg/l)                   | 0.5±0.6     | 0.8±1.9     | 0.217 |
| Fibrinogen (mg/dl)               | 371.4±435.2 | 380.9±181.3 | 0.856 |
| Blood glucose (mg/dl)            | 97.1±20.5   | 106.6±41.4  | 0.091 |
| IL-6 (pg/ml)                     | 6.4±12.8    | 4.9±10.3    | 0.413 |
| Vitamin D (ng/ml)                | 22.7±8.7    | 19.5±9.2    | 0.042 |
| Phosphorus (mg/dl)               | 3.3±1.1     | 3.4±1.1     | 0.790 |
| Calcium (mg/dl)                  | 9.5±1.1     | 9.3±1.0     | 0.472 |
| Alpha-1 antitrypsin (mg/dl)      | 124.3±15.4  | 129.1±18.2  | 0.480 |
| Alpha antitrypsin range abnormal | 1 (1.1)     | 1 (1.1%)    | 0.166 |
| Serology, IgG Ab +ve             | 98 (95.1)   | 43 (91.5)   | 0.536 |

SD: standard deviation

**Tabla S3.** Number and proportion of hospitalized patients with normal or impaired lung function at 12 months with plasma determination of alpha-1 antitrypsin (AAT), allelic genotyping (Pi\*MM, Pi\*MS, Pi\*MZ and Pi\*MP Lowell) and C-reactive protein (CRP) >5 mg/dl.

| Genotype        | Lung function at 12 months |                  |                 |                 |                  |                 | p-value |
|-----------------|----------------------------|------------------|-----------------|-----------------|------------------|-----------------|---------|
|                 | Normal (n=108)             |                  |                 | Impaired (n=49) |                  |                 |         |
|                 | N (%)                      | AAT<br>mean ± SD | CRP >5<br>N (%) | N (%)           | AAT<br>mean ± SD | CRP >5<br>N (%) |         |
| Pi*MM           | 91 (84.2)                  | 126.4±14.7       | 15 (20)         | 40 (81.6)       | 133.9±14.4       | 9 (18.4)        | 0.016   |
| Pi*MS           | 16 (14.8)                  | 116.3±15.4       | 5 (4.6)         | 7 (14.2)        | 116.7±15.4       | 0 (0)           | 0.962   |
| Pi*MZ           | 0                          | -                | 0               | 2               | 89.0±21.2        | 0 (0)           | -       |
| Pi*MP<br>Lowell | 1 (0.9)                    | 95.0             | 0               | 0               | -                | 0               | -       |

SD: standard deviation



**Table S4.** Results of multiple comparison tests between different alpha-1 antitrypsin (AAT) genotyping variants and respiratory function parameters at 6 months.

| Parameter | Genotype |        | Mean difference | SD   | p-value |
|-----------|----------|--------|-----------------|------|---------|
| FEV1 (%)  | Pi*MM    | Pi*MS  | 8.4             | 4.4  | 0.176   |
|           |          | Pi*MZ  | 21.6            | 12.3 | 0.319   |
|           |          | Pi*MP  | -               | -    | -       |
|           | Pi*MS    | Lowell | 13.2            | 13.8 | 1.000   |
|           |          | Pi*MZ  |                 |      |         |
| FVC       | Pi*MM    | Pi*MS  | -33.1           | 16.4 | 0.139   |
|           |          | Pi*MZ  | 14.7            | 49.7 | 1.000   |
|           |          | Pi*MP  | -               | -    | -       |
|           | Pi*MS    | Lowell | 47.8            | 51.6 | 1.000   |
|           |          | Pi*MZ  |                 |      |         |
| FEV1/FVC  | Pi*MM    | Pi*MS  | 0.97            | 2.1  | 1.000   |
|           |          | Pi*MZ  | 8.2             | 6.0  | 0.508   |
|           |          | Pi*MP  | -               | -    | -       |
|           | Pi*MS    | Lowell | 7.3             | 6.2  | 0.728   |
|           |          | Pi*MZ  |                 |      |         |
| TLC %     | Pi*MM    | Pi*MS  | 0.93            | 3.5  | 1.000   |
|           |          | Pi*MZ  | 28.7            | 10.6 | 0.023   |
|           |          | Pi*MP  | -               | -    | -       |
|           | Pi*MS    | Lowell | 27.8            | 11.0 | 0.039   |
|           |          | Pi*MZ  |                 |      |         |
| DLCO %    | Pi*MM    | Pi*MS  | 4.3             | 5.2  | 1.000   |
|           |          | Pi*MZ  | 41.9            | 15.5 | 0.024   |
|           |          | Pi*MP  | -               | -    | -       |
|           | Pi*MS    | Lowell | 37.5            | 16.1 | 0.064   |
|           |          | Pi*MZ  |                 |      |         |
| KCO %     | Pi*MM    | Pi*MS  | -0.21           | 4.3  | 1.000   |
|           |          | Pi*MZ  | 20.5            | 12.8 | 0.335   |
|           |          | Pi*MP  | -               | -    | -       |
|           | Pi*MS    | Lowell | 20.7            | 13.3 | 0.364   |

|                             |       |        |       |      |       |
|-----------------------------|-------|--------|-------|------|-------|
|                             |       | Pi*MZ  |       |      |       |
| RV %                        | Pi*MM | Pi*MS  | -13.8 | 6.4  | 0.099 |
|                             |       | Pi*MZ  | 30.9  | 18.9 | 0.316 |
|                             |       | Pi*MP  | -     | -    | -     |
|                             | Pi*MS | Lowell | 44.7  | 19.7 | 0.075 |
|                             |       | Pi*MZ  |       |      |       |
| 6MWT<br>Distance<br>(m)     | Pi*MM | Pi*MS  | 21.7  | 24.9 | 1.000 |
|                             |       | Pi*MZ  | 210.2 | 74.9 | 0.017 |
|                             |       | Pi*MP  | -     | -    | -     |
|                             | Pi*MS | Lowell | 188.5 | 77.7 | 0.050 |
|                             |       | Pi*MZ  |       |      |       |
| 6MWT<br>Initial<br>SaO2 (%) | Pi*MM | Pi*MS  | 0.02  | 0.38 | 1.000 |
|                             |       | Pi*MZ  | 1.6   | 1.14 | 0.492 |
|                             |       | Pi*MP  | -     | -    | -     |
|                             | Pi*MS | Lowell | 1.6   | 1.2  | 0.558 |
|                             |       | Pi*MZ  |       |      |       |
| 6MWT<br>Final<br>SaO2 (%)   | Pi*MM | Pi*MS  | -0.01 | 0.88 | 1.000 |
|                             |       | Pi*MZ  | 5.5   | 2.6  | 0.140 |
|                             |       | Pi*MP  | -     | -    | -     |
|                             | Pi*MS | Lowell | 5.5   | 2.7  | 0.118 |
|                             |       | Pi*MZ  |       |      |       |

FVC=forced vital capacity; FEV1=forced expiratory volume in the first second; TLC=total lung capacity; RV=residual volume; DLCO=diffusing capacity for carbon monoxide; 6MWT=six minute walk test; SaO2=oxygen saturation; SD=standard deviation
